1 Direct Observation of Heterogeneous Formation of  
2 Amyloid Spherulites in Real-time by Super-  
3 resolution Microscopy

4 *Min Zhang<sup>1</sup>, Henrik D. Pinholt<sup>1</sup>, Xin Zhou<sup>2</sup>, Søren S.-R. Bohr<sup>1</sup>, Luca Banetta<sup>3</sup>, Alessio Zaccone<sup>4</sup>,*  
5 *Vito Foderà<sup>3,\*</sup> and Nikos S. Hatzakis<sup>1,5,\*</sup>.*

6 <sup>1</sup>Department of Chemistry, Faculty of Science, University of Copenhagen, Denmark

7 <sup>2</sup>Department of Pharmacy, Faculty of Health and Medical Sciences, University of Copenhagen,  
8 Denmark

9 <sup>3</sup>Department of Applied Science and Technology, Polytechnic University of Turin, Italy

10 <sup>4</sup>Department of Physics, University of Milan, Italy

11 <sup>5</sup>NovoNordisk centre for Protein research, Faculty of Health and Medical Sciences University of  
12 Copenhagen, Denmark

13 KEYWORDS: Super-resolution imaging, protein aggregation, spherulites, real-time, REPLOM.  
14  
15

## 16 **Abstract**

17 The misfolding of proteins and their aggregation in the form of fibrils or amyloid-like spherulites  
18 are involved in a spectrum of pathological abnormalities. Our current understanding of protein  
19 amyloid aggregation mechanisms has primarily relied on the use of spectrometric methods to  
20 determine the average growth rates and diffraction limited microscopes with low temporal  
21 resolution to observe the large-scale morphologies of intermediates. We developed a REal-time  
22 kinetics via binding and Photobleaching LOcalisation Microscopy (**REPLOM**) super-resolution  
23 method to directly observe and quantify the existence and abundance of diverse aggregate  
24 morphologies below the diffraction limit and extract their heterogeneous growth kinetics. Our  
25 results revealed that even the growth of a microscopically identical aggregates, e.g. amyloid  
26 spherulites, may follow distinct pathways. Specifically, spherulites do not exclusively grow  
27 isotropically but, surprisingly, may also grow anisotropically, following similar pathways as  
28 reported for minerals and polymers. Combining our technique with machine learning approaches,  
29 we associated growth rates to specific morphological transitions and provided energy barriers and  
30 the energy landscape at the level of single aggregate morphology. Our unifying framework for the  
31 detection and analysis of spherulite growth can be extended to other self-assembled systems  
32 characterized by a high degree of heterogeneity, disentangling the broad spectrum of diverse  
33 morphologies at the single-molecule level.

34

35

## 36 Introduction

37 Protein misfolding and aggregation in the form of fibrils or spherulites are a hallmark of a number  
38 of devastating conditions, such as Alzheimer's and Parkinson's disease (Chiti & Dobson, 2006;  
39 Exley et al., 2010; House, Jones, & Exley, 2011). Indeed, elongated protein aggregates, known as  
40 amyloid-like fibrils, are a characteristic of these diseases and, in the last two decades, deciphering  
41 the key steps of their formation has been the main focus of the amyloid research community  
42 (Nielsen et al., 2001; Pinotsi, Buell, Dobson, Schierle, & Kaminski, 2013; Zimmermann et al.,  
43 2021). However, a "one-size-fits-all" approach to describing amyloid-forming systems will not be  
44 successful. Other amyloid-like species (named *superstructures*) may occur that exhibit  
45 significantly different  $\beta$ -sheet packing compared to fibrils (Vito Foderà et al., 2014; Vetri &  
46 Foderà, 2015). These include amyloid-like spherical aggregates, or spherulites, that range from a  
47 few micrometers to several millimeters in diameter and can form both *in vivo* and *in vitro* (Exley  
48 et al., 2010; Mark R. H. Krebs et al., 2004; Vetri & Foderà, 2015). These aggregates are  
49 characterized by a fascinating core-shell morphology and seem to be the result of a general self-  
50 assembly process that is common to metal alloys (Lu, Goh, Li, & Ng, 1999), minerals (Heaney &  
51 Davis, 1995), and polymers (Hosier, Bassett, & Vaughan, 2000; Kajioka, Hikosaka, Taguchi, &  
52 Toda, 2008). Protein amyloid spherulites are hallmarks of disease states. Specifically, deposition  
53 in brain tissues of amyloid spherulites consisting of A $\beta$  peptide has been found in connection with  
54 the onset and progression of Alzheimer disease (Exley et al., 2010; House et al., 2011). In addition,  
55 they may also present opportunities to develop advanced materials for drug delivery (Jiang et al.).  
56 While we have a solid understanding of the fibrillar growth kinetics (Garcia, Cohen, Dobson, &  
57 Knowles, 2014), the mechanisms of the formation and growth of spherulites is still out of reach  
58 (Ban et al., 2006; Domike & Donald, 2007; M. R. H. Krebs, Bromley, Rogers, & Donald, 2005).

59 Current models of the mechanism of protein spherulite formation primarily rely on spectrometric  
60 evidence for their average growth rates (Domike & Donald, 2009; M. R. H. Krebs et al., 2005),  
61 low temporal resolution recordings of growth intermediates (Ban et al., 2006; Yagi, Ban, Morigaki,  
62 Naiki, & Goto, 2007) and observations of the final structures via microscopy techniques (Mark R.  
63 H. Krebs et al., 2004; Toprakcioglu, Challa, Xu, & Knowles, 2019). The evidence has resulted in  
64 a hypothesis that spherulites are core-shell structures in which fibril-like filaments isotropically

65 and radially grow around a dense core (Mark R. H. Krebs et al., 2004; Rogers, Krebs, Bromley,  
66 van der Linden, & Donald, 2006) following a multifractal pattern driven by electrostatic  
67 interactions (Vito Foderà, Zaccone, Lattuada, & Donald, 2013). The complexity of this scenario is  
68 further enhanced by the fact that *in vitro* amyloid spherulites co-exist with fibrils (V. Foderà &  
69 Donald, 2010; Vito Foderà et al., 2013). While the direct observation of fibril growth and time  
70 lapses of spherulite growth with temporal resolution of minutes, was recently reported for A $\beta$   
71 peptides (Andersen et al., 2009; Ban et al., 2006; Yagi et al., 2007; Zimmermann et al., 2021), the  
72 high heterogeneity of aggregate populations within the same self-assembly reaction presents a  
73 further obstacle preventing the correct evaluation of the kinetics of the multiple and concurrent  
74 pathways. Indeed, while bulk methods guarantee that the overall propensity of proteins to form  
75 amyloid structures is rapidly screened (Vetri & Foderà, 2015), they provide limited information  
76 on the aggregation kinetics of individual species, in the form of either fibrils or spherulites,  
77 averaging the effect of the morphological heterogeneity of the aggregate population.  
78 Consequently, novel methods for real-time and direct observations of single-aggregate growth that  
79 can be used to develop and inform models accounting for the heterogeneous growth are highly  
80 desirable.

81 Here we initially combined astigmatism-based 3D direct stochastic optical reconstruction  
82 microscopy (dSTORM) (Huang, Wang, Bates, & Zhuang, 2008), spinning disk confocal  
83 microscopy (Hayashi & Okada, 2015), and scanning electron microscopy (SEM) to directly  
84 observe the formation of individual protein amyloid structures using human insulin (HI) as a model  
85 system. Our results allowed us to differentiate among the different species in solution and decipher  
86 the nature, morphology and abundance of individual spherulites at different growth stages.  
87 Surprisingly, we found that HI spherulite growth is not exclusively isotropic and may occur  
88 anisotropically. We developed a method for the detection of Real-time kinetics via binding and  
89 Photobleaching Localisation Microscopy (**REPLM**) to attain real-time videos of the spherulite  
90 growth process and reconstruct super-resolution images of the spherulites and their growth  
91 kinetics. Using homemade software based on Euclidian minimum spanning tree and machine  
92 learning clustering (Jensen et al., 2021; Malle et al., 2021; Pinholt, Bohr, Iversen, Boomsma, &  
93 Hatzakis, 2021; Stella et al., 2018; J. Thomsen et al., 2020), we quantitatively associated the  
94 growth rates to specific morphological transitions during growth, eventually extracting detailed

95 energy barriers and, thus, the energy landscape for each type of aggregation morphology. We  
96 anticipate that the framework presented here will serve as a unique and generic methodology for  
97 the simultaneous detection and analysis of multiple species within a single self-assembly reaction.  
98 In the specific case of protein systems, the aggregation of which is related to degenerative diseases,  
99 our approach provides a platform for connecting kinetics, morphological transitions, and structure  
100 and further aid our understanding on interventions against degenerative diseases.

## 101 **Results**

### 102 **Direct observation of diverse structures of HI spherulites by 3D dSTORM, SEM and** 103 **spinning disk microscopy**

104 We thermally induced insulin amyloid aggregation using an established protocol (Vito Foderà, van  
105 de Weert, & Vestergaard, 2010) and examined the bulk kinetics by detecting the fluorescence of  
106 the amyloid-sensitive dye Thioflavin T (ThT) and the turbidity signal (Figure S1a). The kinetics  
107 traces at incubation temperature of 60 °C, show the classical three-step profile, with the reaction  
108 reaching completion after only 3-4 hours. The turbidity and ThT signal perfectly overlapped,  
109 suggesting that the aggregation reaction was entirely of an amyloid-like origin (Vito Foderà et al.,  
110 2009). Cross-polarized microscopy recordings of the characteristic Maltese cross, indicating  
111 spherulite formation under these conditions (Mark R. H. Krebs et al., 2004) (Figure S2). However,  
112 standard analysis of the bulk ThT signal was unable to provide information on the morphological  
113 transition occurring during the reaction.

114 To observe directly and with high-resolution the diverse structures of insulin aggregates, we  
115 combined the insights obtained from SEM and 3D dSTORM. Using 3D dSTORM allowed us to  
116 extend beyond diffraction-limited imaging by TIRF microscopy, which may mask spherulite shape  
117 and growth directionality (Huang, Wang, et al., 2008) (Figure 1). Recordings at incubation times  
118 between 0.5 to 4 hours points (see methods) provided direct recordings of the diverse early species  
119 that can co-exist at the same incubation time. We found spherical-like protein condensates of  
120 approximately 200 nm in diameter formed after 0.5 hours, while, a linear pattern was observed  
121 with incubation times ranging between 0.5-1h. Surprisingly, the recordings beyond the diffraction  
122 limit revealed that at longer incubation times the commonly observed spherulites were found to  
123 co-exist in the mixture with anisotropically grown structures (Figure 1, Figure S4, S5c and S5d).

124 The fact that both SEM and 3D dSTORM methods identified the same particle morphology  
125 supports this not to be an artifact of fluorescence microscopy, fluorophore labeling (Figure S1b),  
126 sample drying for SEM imaging (Figure 1). Note however that depending on conditions the  
127 distribution of morphologies may vary slightly consistent with earlier reporting of electrostatic  
128 effect for A $\beta$ -(1-40) (Ban et al., 2006) (see Figure S5f). Extending beyond the diffraction limit  
129 suggest that protein spherulite growth may diverge from isotropically grown in space (Vito Foderà  
130 et al., 2013; Mark R. H. Krebs et al., 2004), and proceed in a preferential direction.

131 The density plots created with 3D dSTORM (Figure 1) clearly showed that the core had a much  
132 higher density than the branching parts, consistent with previous suggestions of the existence of a  
133 low-density corona in spherulite structures (Mark R. H. Krebs et al., 2004; Rogers et al., 2006).  
134 The formation of the high-density cores appears to indicate the nucleation point, with the  
135 subsequent linear-like elongation and branching of slender threadlike fibrils resembling crystalline  
136 growth (Gránásy, Pusztai, Tegze, Warren, & Douglas, 2005; Shtukenberg, Punin, Gunn, & Kahr,  
137 2012). This is consistent with the recently proposed initial protein condensation process (Shen et  
138 al., 2020), and further growth is determined by tight fibril packing, which forces the biomolecular  
139 assembly to occur anisotropically along one specific direction. Delineating this however would  
140 require additional experiment and is beyond the scope of this study. The directly observed  
141 anisotropy challenges the isotropic spherulite growth, for which the process occurs via the  
142 formation of a radiating array of fiber crystallites, but it is observed in the case of crystalline-coil  
143 block copolymer spherulites (Song et al.). The origin of such anisotropy might be due to the  
144 occurrence of secondary and heterogeneous nucleation at the aggregate surface (Galkin & Vekilov,  
145 2004; Zimmermann et al., 2021), with different binding efficiencies depending on the aggregate  
146 areas. While the data in Figure 1 would be consistent with the secondary nucleation, deciphering  
147 this with additional data falls beyond the scope of this work.

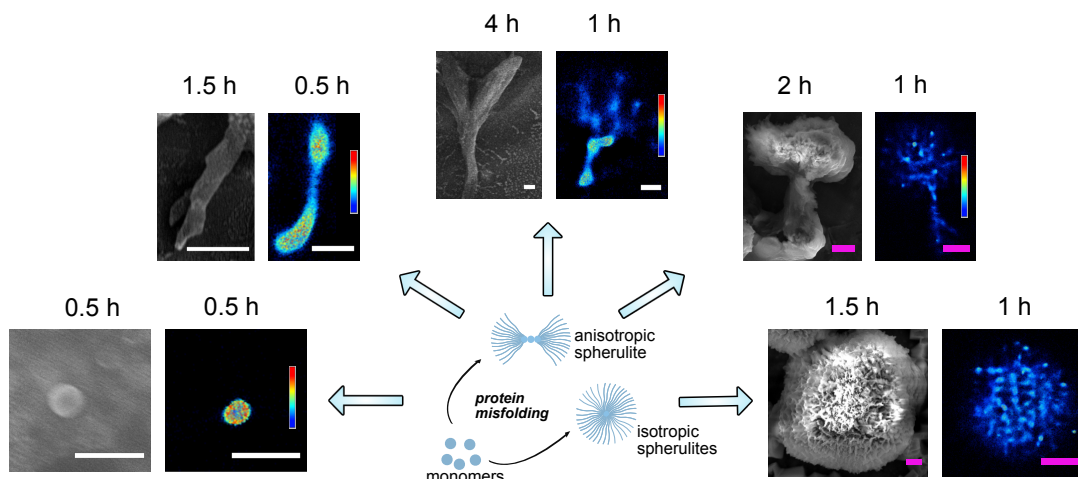

148

149 **Figure 1. SEM and super-resolution 3D dSTORM reconstructed images of the co-existing in solution**  
150 **morphologies of the anisotropically/isotropically grown structures of different HI aggregates.** 3D dSTORM  
151 images: density plots, pseudocolor scale corresponds to neighbor localisations: the density of neighboring events  
152 within a 100-nm radius sphere from localization. Pseudocolor scale ranges from 0 to 1000 for the first image on left  
153 and 0 to 400 for the rest. Scale bars in white color are 1 μm and scale bars in purple color are 5 μm.

154

155 The diameter of the early linear aggregates increased as a function of time (Table S1). This  
156 indicates that the growth was not limited to end-to-end attachment to the linear aggregate, and  
157 lateral aggregation also took place. While this is to a certain extent expected (Zimmermann et al.,  
158 2021), the super resolution recordings allowed its quantification. The early central linear  
159 structures, with diameters of  $400 \pm 100$  nm (see Table S1), successively branched to form radially  
160 oriented amyloid fiber-like structures. The further away from the core, the higher the increase in  
161 branching frequency, yielding more space-filling patterns. The dimensions of the corona-like  
162 structure were  $\sim 2$  μm to  $>20$  μm, as shown in Figure 1.

163 To exclude that diverse morphologies originate from electrostatic interactions with surface  
164 immobilization (Ban et al., 2006; Elsharkawy et al., 2018). We used spinning disk microscopy and  
165 SEM to detect the morphology of spherulites at different growth stages in solution (see Figure S5).  
166 Consistent with the data displayed in Figure 1, we detect both spherulites with asymmetrically  
167 grown (Figure 2a and 2b) and symmetrically grown (Figure 2c and 2d) lobes supporting (see 3D  
168 videos of Figure 2a and 2c in Supplementary Movies. S1 and S2). We confirmed that the  
169 asymmetric growth was not an artifact of substrate depletion, as spherulites with asymmetric lobes  
170 had already formed by 2 hours of incubation (Figure 1). This suggests that growth periods of



171 multiple rates occurred within a single sample (Figure S5), which may be masked in bulk kinetics.  
172 Moreover, our data indicated the possibility that growth did not occur entirely isotropically from  
173 the central core, but rather, there was initially a preferential direction.

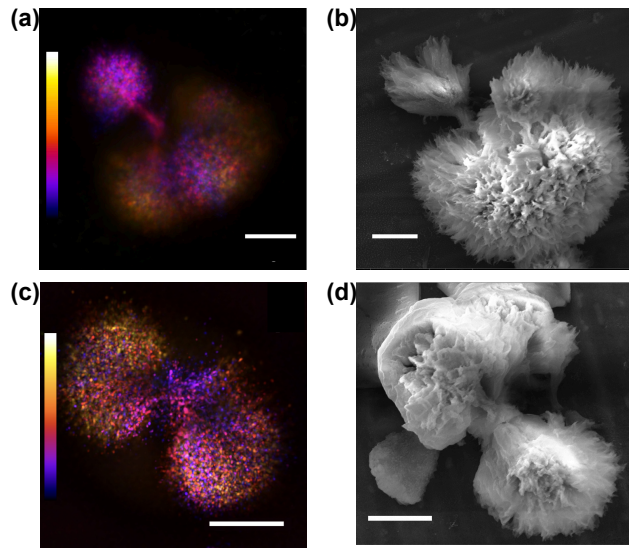

174  
175 **Figure 2. Structure of anisotropically grown human insulin spherulites of two distinct growth-morphologies.** a)  
176 and b) Spherulites with two asymmetric sides captured by spinning disk confocal microscopy and SEM, respectively.  
177 c) and d) Spherulites with symmetric two side structures captured by spinning disk confocal microscopy and SEM,  
178 respectively. Data in (a) and (c) were acquired for a sample from incubation time of 16 h at 60 °C. Data in (b) and (d)  
179 are for a sample from an incubation time of 4 h at 60 °C. Color scales are from  $-14.04\ \mu\text{m}$  to  $14.04\ \mu\text{m}$  in (a) and  
180  $-8.46\ \mu\text{m}$  to  $8.46\ \mu\text{m}$  in (c). Scale bars are 10  $\mu\text{m}$ . All samples were covalently labeled with Alexa Fluor 647.

181  
182 **REPLM: a super resolution method for the real time direct observation of growth of**  
183 **protein aggregation**

184 We developed a new super-resolution experimental method based on single-molecule  
185 localisation microscopy, to quantitatively measure the growth rates at the single-aggregate level  
186 while simultaneously monitoring the morphological development of the structure. We named the  
187 method REal-time kinetics via binding and Photobleaching Localisation Microscopy (REPLM),  
188 as it allows researchers, for the first time, to directly image the morphological development of each  
189 individual aggregates in real-time with super-resolution and, simultaneously, access the kinetic  
190 traces for thermodynamic analysis of the process. To perform REPLM, HI monomers were  
191 covalently labeled with Alexa Fluor 647 NHS Ester (see Supplementary Information for



192 experimental details). Figure 3a illustrates how REPLOM works: initially, only small protein  
193 condensates, i.e., cores, are formed and bind to the poly-L-lysine-covered surface. The spatial  
194 location of each of the fluorophores is accurately detected prior to their photobleaching (Bohr et  
195 al., 2019; Moses et al., 2021). Optimizing the imaging settings and the absence of imaging buffer  
196 ensures rapid chromophore bleaching after binding (see Methods and Figure S8). As the growth  
197 progresses, additional HI monomers from the solution bind to the core, extending the dimensions  
198 of the aggregate. Each labeled insulin binding event results in a diffraction-limited spot, the precise  
199 location of which can be accurately extracted, similarly to in photoactivated localization  
200 microscopy (PALM) methodologies (Betzig et al., 2006) (see Methods and Figure S9 for  
201 resolution of the method and Supplementary Movie S3-S4).

202 Parallelized recordings of the spatially distinct binding of multiple individual HI loaded with  
203 emitters allow the real-time direct observation of the temporal morphological development of each  
204 aggregate (see Figure 3b, Figure S10, and Supplementary Movies, S3-S4). The methodology is  
205 reliant on the intrinsic bleaching of chromophores to extract their coordinates (Burnette, Sengupta,  
206 Dai, Lippincott-Schwartz, & Kachar, 2011; Gordon, Ha, & Selvin, 2004; Qu, Wu, Mets, &  
207 Scherer, 2004) and is similar to Binding Activation Localisation Microscopy (BALM) (Ries et al.,  
208 2013), which measures existing structures, but additionally facilitates real-time direct observation  
209 of the growth process. It also extends beyond recent methods based on conventional TIRF to  
210 observe exclusively fibril growth (Zimmermann et al., 2021) or low temporal resolution time  
211 lapses of linear or spherulite growth (Andersen et al., 2009; Ban et al., 2006; Yagi et al., 2007),  
212 offering in addition rate recording and morphological development of both fibrillar and spherulite  
213 structures even below the diffraction limit. Consequently, the geometry and morphological  
214 development of each aggregate can be observed directly with sub-diffraction resolution, offering  
215 the extraction of each particle's growth kinetics.

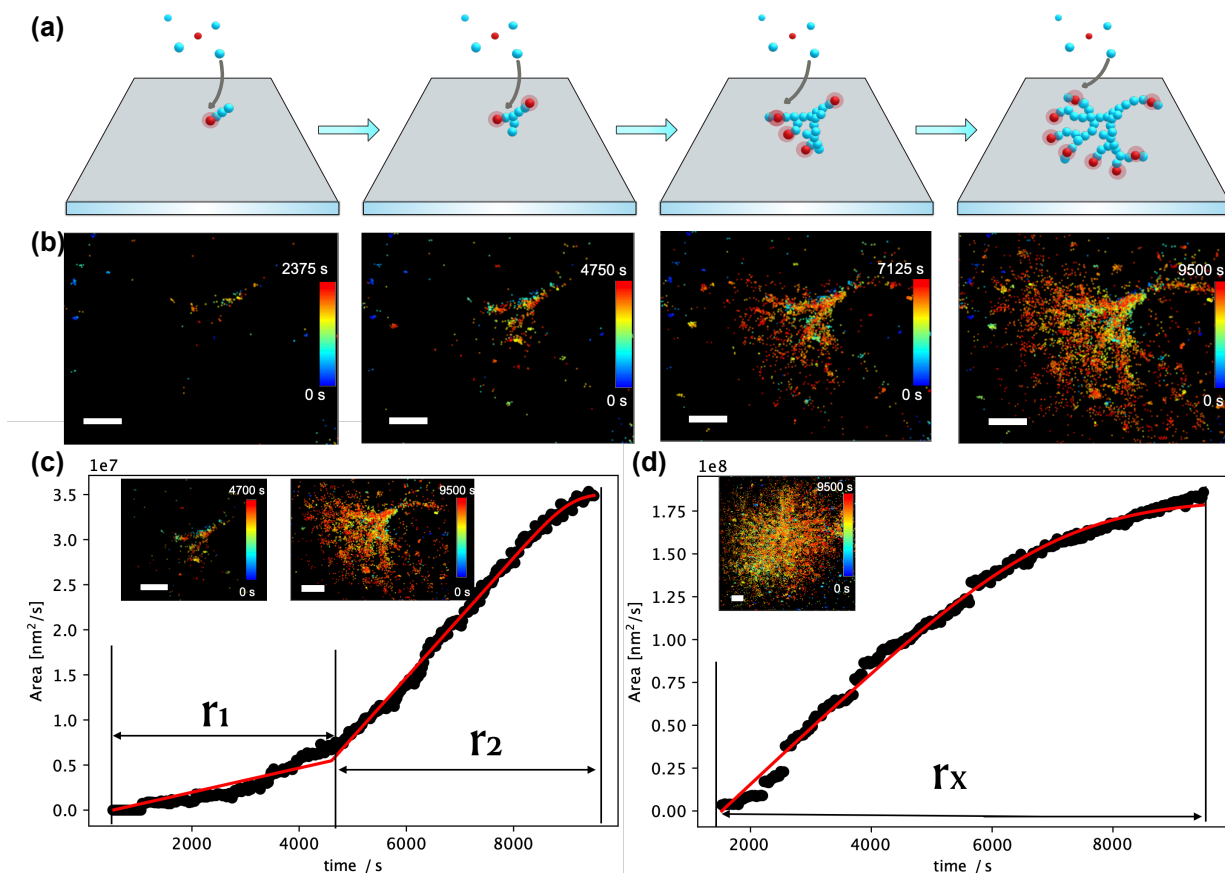

216

217 **Figure 3. Direct real-time observation of HI aggregate growth by REPLOM (real-time kinetics via binding**  
 218 **and photobleaching localisation microscopy).** a) Cartoon representation of REPLOM: initially, the fluorescent  
 219 signal from the small fluorescently labeled protein condensates was detected, followed by chromophore  
 220 photobleaching. As the growth progressed, labeled insulins from solution bound to the aggregate, increasing the  
 221 dimensions. Each binding event resulted in a diffraction-limited spot, the coordinates of which were accurately  
 222 extracted, before it was photobleached by the intense laser. Parallelized recordings of the spatially distinct binding  
 223 of multiple individual emitters revealed the temporal morphological development of several aggregates (Red is  
 224 Alexa Fluor 647-labeled HI in fluorescent state, and blue is un-labeled insulin or Alexa Fluor 647-labeled HI in  
 225 dark/photobleached state). b) Direct real-time observation of temporal development of anisotropic growth at t =  
 226 2375 time intervals. Scale bars: 2  $\mu$ m. c) and d) Growth curves of anisotropic spherulite (c) and isotropic spherulite  
 227 (d). For anisotropic spherulites, the curve contains two parts roughly correlating with the formation of the core/linear  
 228 part and branching part (see method REPLOM section). Isotropic spherulite growth was linear and followed by  
 229 saturation. Inset: the corresponding HI spherulite obtained by REPLOM. Scale bars: 2  $\mu$ m. See SI for the movies.

230

### 231 Extraction of growth rates for diverse aggregate morphologies

232 Consistent with the 3D dSTORM data, the direct observation of HI spherulite growth by  
 233 REPLOM confirmed that HI spherulites grow both anisotropically and isotropically (Figure 3). To

234 extract the growth rate kinetics for each individual aggregate, we identified the points belonging  
 235 to the growing aggregate with an approximate Euclidean Minimum Spanning tree segmentation  
 236 (Cowan & Ivezić, 2008) and estimated the area using a Gaussian mixture model based on  
 237 hierarchical clustering in Figure 3c and 3d (see Supporting Information for the details) (Jensen et  
 238 al., 2021; Pinholt et al., 2021; Stella et al., 2018; J. Thomsen et al., 2020). For isotropic  
 239 morphologies, a single linear growth rate was observed ( $r_1$ ) followed by a plateau (see Supporting  
 240 Information), while for anisotropic morphologies the growth curve consisted of two rate  
 241 components ( $r_1$  and  $r_2$ ), as shown in Figure 3c and 3d and Figure S11;  $r_1$  corresponds to the initial  
 242 linear core and  $r_2$  to the branching part, and they best fitted to reaction-limited linear growth and a  
 243 diffusion-limited sigmoidal growth, respectively (Domike & Donald, 2007, 2009; Goldenfeld,  
 244 1987; Majumder, Busch, Poudel, Mecking, & Reiter, 2018; Tanaka & Nishi, 1985) (see Methods  
 245 and Supplementary Movies S3-S8). Consequently, the growth rates ( $r_1$ ,  $r_2$ , and  $r_x$ ) for each  
 246 individual aggregate were extracted. The growth readouts of the individual geometrically distinct  
 247 morphologies allowed us to go beyond the standard analysis of sigmoidal curves, which does not  
 248 yield information on, or discriminate between, the temporal developments for each morphology.  
 249 REPLOM revealed that the anisotropic growth operated via a two-step process imposed by the  
 250 geometry of the growth—a pattern masked in current super-resolution and bulk readouts.

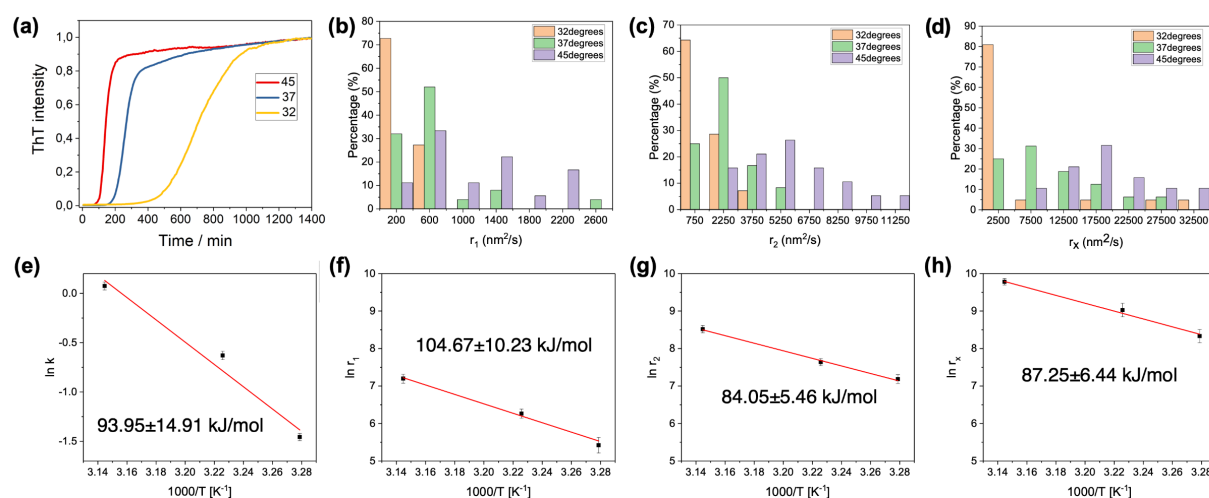

251

252 **Figure 4. Kinetic and thermodynamic characterization of insulin aggregation** a) Normalized bulk ThT  
 253 fluorescence kinetics on with incubation temperatures of 45, 37, and 32 °C. b) and c) REPLOM-extracted rate  
 254 distribution of anisotropic aggregates at the three different incubation temperatures: (b) linear part and (c) branching  
 255 part. d) Rate distribution of isotropic aggregates at the three different incubation temperatures. e-h) Arrhenius plots

256 for spherulites obtained from bulk experiments (e), and REPLOM (f-h). The formation of linear (f) and branched (g)  
257 parts of anisotropic spherulites, and the formation of isotropic spherulites (h).

258

## 259 **Extraction of Energy barriers for the growth of diverse HI spherulites morphologies**

260 The real-time single-particle readout from REPLOM facilitates the kinetic analysis of the  
261 temperature dependence of growth for each diffraction limited type of spherulite morphology and,  
262 consequently, the extraction of the activation energy barriers for both the spherulite morphologies  
263 and growth phase. Therefore, HI aggregate formation was induced at three different temperatures  
264 accessible without introducing optical artefacts in our microscopy setup: 45 °C, 37 °C, and 32 °C.  
265 The ThT fluorescence measurements at the three temperatures representing the average growth  
266 kinetics are shown in Figure 4a. The rate distributions at the three temperatures for each type of  
267 morphological growth are shown in Figure 4 b, 4c, and 4d (N = ~20, see also Figure S12). As  
268 expected, the linear parts  $r_1$  (Figure 4b) and branched parts  $r_2$  (Figure 4c), as well as the isotropic  
269 growth rate  $r_x$  (Figure 4d), increased at increased incubation temperature. The data do not show a  
270 pronounced curvature, and this may be due to the narrow temperature range investigated in our  
271 study and is in agreement with earlier studies (Buell et al., 2012). This would suggest that the  
272 differences in heat capacity between the soluble states of the proteins and the transition states for  
273 aggregation are small (Buell et al., 2012). Using the Arrhenius equation (Buell et al., 2012; Cohen  
274 et al., 2018) (Figure 4e-4h), we extracted the activation energy of each of the isotropic or  
275 anisotropic morphological growths and the respective linear or branching part of the individual  
276 aggregates. For the linear part of the anisotropic spherulites, the activation energy was  $104.67 \pm$   
277  $10.23$  kJ/mol (Figure 4f), while for the branched part it was  $84.05 \pm 5.46$  kJ/mol (Figure 4g), and  
278 for the isotropically grown spherulites it was  $87.25 \pm 6.44$  kJ/mol (Figure 4h). The activation  
279 energy extracted from the bulk kinetics shown in Figure 4e ( $93.95 \pm 14.91$  kJ/mol) is consistent  
280 with data on bovine insulin fibril formation (~100 kJ/mol) (Buell et al., 2012). The REPLOM  
281 methodology on the other hand allowed deconvolution of a higher barrier related to step 1 in the  
282 anisotropic growth ( $r_1$ ) and lower barrier in the branching part of isotropic and anisotropic growth  
283 ( $r_x$  and  $r_2$ ). Together, these data indicate that the pronounced heterogeneity of growth mechanisms  
284 and structures within the aggregation ensemble leads to heterogeneity of the activation barriers.  
285 We indeed highlighted that spherulite growth may proceed both isotropically and anisotropically,  
286 with the latter presenting a two-step process imposed by the geometry of the growth and

287 characterized by two activation energies that are markedly different to those obtained by bulk  
288 kinetics and for insulin fibrils (Buell et al., 2012).

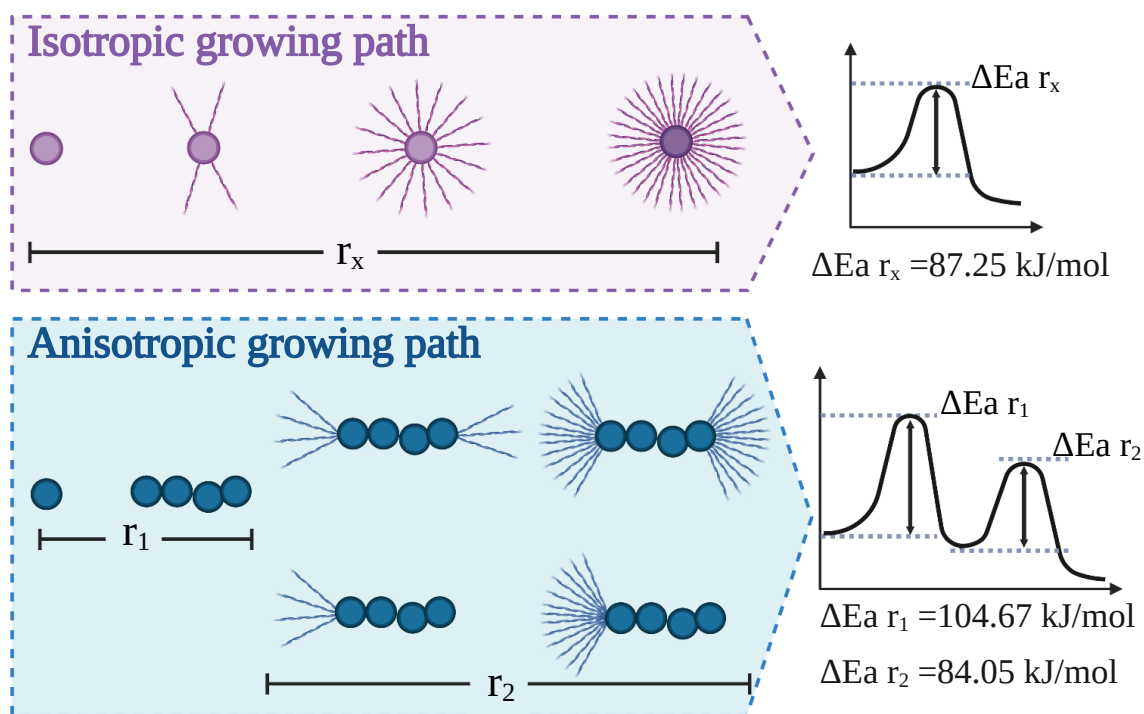

289

290 **Figure 5. Schematic representation of the diverse pathways of insulin aggregation and their respective energy**  
291 **barriers** Top: Isotropic spherulite growth, where fibril-like filaments isotropically and radially grow on a dense core.  
292 Process is characterized by a single activation energy of  $\sim 87$  kJ/mol. Bottom: anisotropic growth, where the dense  
293 core is growing linearly before it successively branches to form radially oriented amyloid fiber-like structures. The  
294 further the branching from the core, the more increased the branching frequency, yielding a more space-filling pattern.  
295 The process involves two steps imposed by the geometry of the growth and characterized by two activation energies  
296 of 104 and 84 kJ/mol for the linear and branching parts, respectively.

297

## 298 **Discussions**

299 Our combined results revealed that the growth of amyloid core-shell structures for insulin, i.e.,  
300 spherulites, may proceed not only via isotropic growth but also by following a multistep pathway  
301 characterized by initial pronounced anisotropic behavior (Figure 5). The anisotropic growth may  
302 thus not be an exclusive property of metal alloys, salts and minerals, but may extend to protein  
303 aggregates. In essence are data are consistent with a unifying mechanism underlying chemical  
304 growth of both biological soft materials and hard-non biological composites. Such variability in  
305 growth within the same aggregation reaction results in a spectrum of aggregation kinetics traces

306 that can be quantitatively detected by our method, allowing the operator to extract the  
307 thermodynamic parameters for each of the aggregation subsets. These findings underscore how  
308 conclusions solely based on bulk kinetics data may overlook the complexity and heterogeneity of  
309 the aggregation process.

310 Our novel experimental approach offers real-time detection of super-resolution images during  
311 protein aggregation kinetics. The REPLOM method allows the direct observation of self-assembly  
312 kinetics at the level of single aggregates and the quantification of the heterogeneity of aggregates  
313 and their growth mechanisms, which are otherwise masked with current methodologies. Our  
314 general framework can be extended to the simultaneous detection of markedly different structures  
315 within a single aggregation reaction and contribute to research into a more comprehensive  
316 representation of the generalized energy landscape of proteins. This will offer the unique  
317 possibility of disentangling different mechanisms leading to the myriad of aggregate structures  
318 that occur. The method is implemented on the insulin model systems, but can be easily translatable  
319 to more medically relevant proteins, such as  $\alpha$ -synuclein or A $\beta$  peptide. Deciphering whether these  
320 structures persist in the context of the cellular environment and the direct physiological  
321 implications of anisotropically grown morphologies would require combination of our  
322 methodologies with DNA-paint and antibodies as recently developed (Sang et al., 2021). Our  
323 approach may indeed provide unprecedented information on transient intermediate species, which  
324 are nowadays recognized as the cause of progression in many diseases, in terms of both energetics  
325 and morphology. Finally, our approach is general and may be applicable to generic self-assembly  
326 reactions of systems characterized by a high degree of heterogeneity.

## 327 **Materials and Methods**

### 328 **Human insulin (HI) labeling and spherulite preparation.**

329 Alexa Fluor 647 NHS Ester (ThermoFisher Scientific) was dissolved in anhydrous-DMSO to a  
330 concentration of 2 mg/mL. 5  $\mu$ L of the dye solution was added to 1 mL 5 mg/mL HI (91077C,  
331 Sigma-Aldrich, 95%) monomer solution, mixed gently and thoroughly. The mixed solution was  
332 allowed to react for  $\sim$ 2 hours at room temperature to complete the conjugation. After that the  
333 labeled protein was purified from the excess of free dye by a PD SpinTrap G-25 column (GE  
334 Healthcare), divided into aliquots and stored at -80  $^{\circ}$ C.

335

336 HI spherulites were formed in 0.5 M NaCl, 20% acetic acid (VWR Chemicals, 98%) solution with  
337 pH around 1.7. The ratio of labeled to unlabelled HI monomer was about 1 to 60000 (dSTORM)  
338 or 1 to 10000 (RE-PLOM), with the final concentration of HI was 5 mg/mL. The solution was  
339 filtered through 0.22  $\mu\text{m}$  filters (LABSOLUTE) and then incubated in a block heater.

#### 340 **Atto 655-labeled liposome preparation for 3D dSTORM calibration.**

341 Atto 655-labeled liposomes with 2% negative charge which were used for the 3D dSTORM  
342 calibration were prepared as previously published method (R. P. Thomsen et al., 2019). In detail,  
343 a ratio of 97/2/0.5/0.5 for 1,2-Dioleoyl-sn-Glycero-3-Phosphocholine (DOPC), 1,2-dioleoyl-sn-  
344 glycero-3-phospho-L-serine (sodium salt) (DOPS), 1,2-distearoyl-snglycero-3-  
345 phosphoethanolamine-N-[biotinyl(polyethylene glycol)-2000] (ammonium salt) DSPE-PEG<sub>2000</sub>-  
346 biotin and Atto655-PE were added to a glass vial. The solvent chloroform was removed completely  
347 by nitrogen flow for about 10 minutes followed by vacuum for several hours. The lipid film was  
348 rehydrated in MES buffer (pH 5.6) to final total lipid concentration 0.5 mg/mL, vortexed for 30  
349 seconds and incubated for 30 minutes. The sample was extruded 11 times through a polycarbonate  
350 membrane filter with a pore size 50 nm. Then the liposome suspension was exposed to 10 cycle  
351 of flash-freezing and thawing so as to ensure an unilamellar membrane structure. The liposomes  
352 were aliquoted and stored at -20 °C.

#### 353 **Turbidity / Thioflavin T (ThT) fluorescence kinetics.**

354 For in situ absorbance or ThT fluorescence, experiments were carried out using a plate reader  
355 system (BMG LABTECH, CLARIOstar) with 96-microwell polystyrene plates (Nalge Nunc,  
356 ThermoFisher Scientific). Each well contained 200  $\mu\text{L}$  solution. The plates were covered with a  
357 self-adhesive sealing film (nerbe plus, for absorbance) or a clear polyolefin film with sealing tape  
358 (Thermo Fisher Scientific, for ThT fluorescence) to avoid evaporation of the samples and  
359 incubated at the desired temperatures without mechanical shaking. For absorbance, the excitation  
360 wavelength was 480 nm; and for ThT fluorescence, the solution contained 20  $\mu\text{M}$  ThT and the  
361 emission intensity at 486 nm was recorded upon excitation at 450 nm. The signal was detected  
362 every 309 s.



363 **Spinning Disk Microscopy.**

364 The 3D images of grown spherulites were taken by a SpinSR10-spinning disk confocal super  
365 resolution microscope (Olympus) using a silicone oil-immersion 100x objective  
366 (UPLSAPO100XS, NA=1.35, Olympus). The Alexa Fluor 647-labeled HI spherulites were excited  
367 with a 640 nm laser (OBIS COHERENT). The exposure time was 50 ms and the z step length was  
368 0.36  $\mu\text{m}$ .

369 **Scanning Electron Microscopy (SEM).**

370 SEM images of spherulites were taken by using a Quanta FEG 200 ESEM microscope.

371 **Cross Polarized Microscopy.**

372 Images were collected using a 10x objective and crossed polarised which enabled spherulites to  
373 show the characteristic Maltese cross (Zeiss Axioplan Optical Microscope, Carl Zeiss).

374 **Super-resolution Imaging**

375 Super resolution imaging was attained on an inverted Total Internal Reflection microscope (TIRF)  
376 (Olympus IX-83) with a 100x oil immersion objective (UAPON 100XOTIRF, NA=1.49,  
377 Olympus) Alexa Fluor 647 was excited by a 640 nm solid state laser line (Olympus) and reflected  
378 to a quad band filter cube (dichroic mirrors ZT640rdc, ZT488rdc and ZT532rdc for splitting and  
379 with single-band bandpass filters FF02-482/18-25, FF01-532/3-25 and FF01-640/14-25). Signal  
380 was detected by an EMCCD camera (imagEM X2, Hamamatsu).

381 **3D direct Stochastic Optical Reconstruction Microscopy (3D dSTORM) and image**  
382 **analysis.**

383 3D dSTORM imaging was achieved by installing a cylindrical lens ( $f = 500$  mm) in the emission  
384 pathway of (TIRF) to introduce the astigmatism of point spread function (PSF) (Huang, Wang, et  
385 al., 2008). All the dSTORM imaging experiments were performed at room temperature (21  $^{\circ}\text{C}$ ).

386 The exposure time was 30 ms and 10000 frames for each movie.

387 To extract z information from the widths of single molecule images, we generated a calibration  
388 curve of PSF width in the lateral plane ( $W_x$  and  $W_y$ ) as a function of height by measuring Atto  
389 655-labeled liposomes using TIRF with a step size of 10 nm and exposure time of 30 ms (Fig. S3).

390 The HI aggregates which were incubated in a block heater for 0.5 hours to 2 hours at 60  $^{\circ}\text{C}$ . At the  
391 desired time they were added to the poly-L-Lysine treated microscope chamber (Chen et al., 2017)

392 and incubated for 10 min at room temperature to ensure immobilization. Extra sample was washed  
393 away with MilliQ water. Imaging buffer containing 50 mM Tris, 10 mM NaCl, 10% (w/v) glucose,  
394 0.5 mg/mL glucose oxidase, 40 µg/mL catalase and 0.1 M MEA (Huang, Jones, Brandenburg, &  
395 Zhuang, 2008) was flushed into the chamber for dSTORM imaging. All measurements were  
396 carried out at room temperature. The optimal ratio of labeled to unlabeled insulin that provided  
397 reliable signal without affecting the aggregation process or compromising resolution was 1 to  
398 60,000. This is quite different from earlier dSTORM imaging of fibrils using a ratio of 1/20 (Pinotsi  
399 et al., 2014) because of the much higher 3D density of spherulites that prevent reliable super  
400 resolution imaging at high labeling ratios.

401 The 3D dSTORM data was analysed by ThunderSTORM (Ovesný, Křížek, Borkovec, Švindrych,  
402 & Hagen, 2014). The z information of individual localisations was extracted based on the  
403 calibration curves (calculated by ThunderSTORM, shown in Figure S3). The detected localisations  
404 were further filtered according to their intensity and drift correction, in order to remove some  
405 possible false positive or poor quality detections. 3D super-resolution images were visualized with  
406 ViSP software (Beheiry & Dahan, 2013).

#### 407 **REal-time kinetic via Photobleaching Localisation Microscopy (REPLOM)**

408 **Preparation of HL aggregates and imaging.** The solution containing 5 mg/mL HI monomer  
409 was first incubated in a block heater to skip the lag phase. The optimal pre-incubation time for  
410 spherulite formation on the microscope surface was found to be ~ 8 hours for 45 °C, 20 hours for  
411 37 °C and 75 hours for 32 °C, respectively. Then they were transferred to poly-L-lysine coated glass  
412 slide chambers and covered by a lip to prevent solvent evaporation during imaging (Figure S6).

413 REPLOM was performed on the same TIRF microscope setup as the 3D STORM without the  
414 cylindrical lens. Alexa Fluor 647 labeled HI was excited by 640nm solid state laser lines  
415 (Olympus). We found the optimal ratio of labeled to unlabeled insulin for REPLOM to be ca. 1 to  
416 10,000. A high labelling density would result in proximate fluorophores from the newly grown  
417 area emitting simultaneously and therefore cause mislocalization (Pinotsi et al., 2014). Too low  
418 labeling ratio may cause some details, e.g. small branching part, during spherulites growth to be  
419 undetected. Imaging was performed with an exposure time of 30 ms followed by a waiting time  
420 for each frame of 20-40 seconds so as to capture in real time the slow kinetics of spherulite

421 formation. This frame rate allowed to capture both seed formation and extract the growth rate of  
422 insulin aggregates. Faster frame rates may be required for different protein aggregates (Ogi et al.,  
423 2014). All image acquisition was performed at the same incubation temperatures as in the block  
424 heater. The incubation temperatures during the imaging processes were achieved by a heating unit  
425 2000 (PECON).

426 **Data analysis.** The data was analysed by ThunderSTORM. Some possible false positive or poor-  
427 quality detections were removed by intensity filter. Figure S7 shows the comparison of images  
428 prior to and after drift correction. The reconstructed images with time series were obtained by  
429 ViSP (Beheiry & Dahan, 2013) software. For Quantification of growth kinetics is available in  
430 Supporting Information.

431 **Lifetime of fluorophores.** The lifetime of fluorophores in REPLOM was evaluated by checking  
432 the duration time of fluorescent state before they were photobleached. We checked 1885 individual  
433 Alexa Fluor 647 fluorophores and found they were photobleached very fast without imaging buffer  
434 (Figure S7). The lifetime is about  $0.7845 \pm 0.0017$  frames.

435 **Resolution of REPLOM.** The resolution of REPLOM was determined by the FWHM of single  
436 spot's intensity (Figure S9) using an adapted version of previously published software (Bohr et al.,  
437 2019; R. P. Thomsen et al., 2019). Briefly, using our subpixel resolution software, we were able  
438 to extract multiple (91) single spots (see Figure S9) and align all to the same center. Fitting a two-  
439 dimensional gaussian to the resulting stacked clusters allowed the reliable extraction of FWHM  
440 used to determine the obtained resolution. Using a maximum likelihood fitting scheme avoided  
441 potential bias from data binning.

442 **Quantification of growth kinetics by Euclidean Minimum Spanning tree.** The method for  
443 identification of candidates for fluorophores docking on a growing aggregate was inspired by  
444 recent published work (Cowan & Ivezić, 2008) and done in the following way:  
445 First, using all detected RE-PLOM spots from the movie, an approximate Euclidean Minimum  
446 Spanning tree was constructed using only the 30 nearest neighbors as candidates for edges.  
447 Regions of aggregate candidates were cut from each other by removing all edges with lengths more  
448 than the 95th percentile. This is an effective way of separating high-density regions from low-  
449 density regions. The computation was done using the function HierarchicalClustering from the

450 astroML python package. Since we were interested mostly in the large insulin aggregates where  
451 the internal structure was visible, it was decided that all clusters obtained in this manner with less  
452 than 100 detected fluorophores were excluded from the subsequent analysis.

453 The time-dependency of the aggregate growth was found by a similar approach. At each frame,  
454 for a cluster, a refined grouping was done by cutting an approximate Euclidean Minimum  
455 Spanning tree made using 10 neighbors with a distance cutoff of 400nm which was found to be  
456 optimal for removal of most spots outside the aggregate while still not cutting up the main group.  
457 The points from the largest subgroup resulting from this analysis were defined to be the aggregate  
458 for that frame.

459 The area of the aggregate was estimated using a gaussian mixture model with a component for  
460 every 5 points in the aggregate, but not less than 25 components (Cowan & Ivezić, 2008). We  
461 defined the area of the aggregate as the region lying above the average probability density in this  
462 fit. The growth profile resulting from our approach had a few artifacts like jumps and fluctuations  
463 due to mixture model fitting and aggregate segmentation, but we found that the resulting growth  
464 curve in most cases had an identifiable trend, and the results were quite consistent across parameter  
465 choices.

466 From the estimated area of the aggregate in each frame, a growth curve could be plotted.

467 The radial growth rate of such aggregates has previously been found to be either reaction-limited  
468 or diffusion-limited, leading to linear increase in time or increase as  $\propto \sqrt{t}$  respectively (Domike  
469 & Donald, 2007; Goldenfeld, 1987; Majumder et al., 2018; Tanaka & Nishi, 1985). If we assume  
470 that the estimated area of the aggregated is directly related to the radius as  $A \propto R^2$  the two growth  
471 types lead to the following models

472

473 
$$\frac{dA(t)}{dt} = r_1,$$

474

475 
$$\frac{dA(t)}{dt} = \frac{1}{2} r_1 t.$$

476

477 Where the first model is diffusion limited and the second is reaction limited. We found that many  
478 of the structures were initially consistent with reaction limited diffusion and then shifted to either  
479 diffusion or reaction limited growth with a new rate. To allow for this shift, we let the growth be  
480 diffusion limited up to a switch-point  $t_0$  after which the growth rate changes. We formulate one  
481 such model which ends reaction limited and one which remains diffusion limited

482

483 
$$\frac{dA(t)}{dt} = \begin{cases} r_1, & t_0 > t \\ r_2, & t_0 \leq t \end{cases},$$

484 
$$\frac{dA(t)}{dt} = \begin{cases} r_1, & t_0 > t \\ \frac{1}{2}r_2 t, & t_0 \leq t \end{cases}.$$

485

486 Finally, without continuous flow of constituent monomer, the growth inevitably saturates at a  
487 plateau (Domike & Donald, 2009). For both models, we therefore introduce a switch time  $t_1$  after  
488 which the growth slowly saturates sigmoidally over a time interval  $5\tau$

489

490 
$$\frac{dA_{\text{lin}}(t)}{dt} = \begin{cases} r_1, & t_0 > t \\ r_2, & t_0 \leq t < t_1 \\ r_2 \frac{1}{1 + e^{\frac{5(t-\tau-t_1)}{\tau}}}, & t_1 \leq t \end{cases},$$

491

492 
$$\frac{dA_{\text{par}}(t)}{dt} = \begin{cases} r_1, & t_0 > t \\ \frac{1}{2}r_2 t, & t_0 \leq t < t_1 \\ \frac{1}{2}r_2 \frac{t}{1 + e^{\frac{5(t-\tau-t_1)}{\tau}}}, & t_1 \leq t \end{cases}.$$

493

494 Where we introduced the names  $A_{\text{lin}}$  and  $A_{\text{par}}$  referring to the linear-like and parabolic-like shape  
495 of the two resulting growth curves. We found the anisotropic spherulites to fit best with  $A_{\text{lin}}$  and  
496 the isotropic spherulites fit best with  $A_{\text{par}}$ .

497 When fitting an experimentally observed aggregate growth curve  $\{A_i, t_i\}$ ,  $i \in (0, N - 1)$  the  
498 equations were numerically integrated from an initial timepoint  $(A_0, t_0)$  to the final timepoint  
499  $(A_{N-1}, t_{N-1})$ . For each growth curve, the parameters  $(r_1, r_2, t_0, t_1, \tau)$  were estimated with a chi2  
500 fit. Each fit was run twice, the first fit was unweighted and were used to estimate the error bars  
501 using the standard deviation of the residuals. The second fit used the residuals in a weighted chi2  
502 fit to obtain the final fit parameters for the growth curve.

503

#### 504 **Data availability**

505 All data sets used for figures are provided as source data in the manuscript. Source code and  
506 executable can be found at <https://github.com/hatzakislab/REPLOM-analysis-tool>. All source  
507 data are available at <https://sid.erda.dk/sharelink/fje3exOlq2>.

508

#### 509 **Author information**

#### 510 **Corresponding Author**

511 \* Vito Foderà, Email: [vito.fodera@sund.ku.dk](mailto:vito.fodera@sund.ku.dk)

512 \* Nikos S. Hatzakis, Email: [hatzakis@chem.ku.dk](mailto:hatzakis@chem.ku.dk) (NSH).

#### 513 **Author Contributions**

514 M.Z, N.S.H and V.F wrote the paper with feedback from all authors. M.Z designed, carried out  
515 and analysed all microscopy experiments, and prepared all samples. H.D.P wrote the automated  
516 cluster finding and rates analysis algorithm. M.Z and X.Z did the ThT-fluorescence and turbidity  
517 measurements. S.S-R.B calculated the resolution of REPLOM and fluorophore's lifetime. L.B and  
518 A.Z helped with the mechanism explanation. N.S.H conceived the project idea, in collaboration  
519 with V.F., and had the overall project management and strategy.

## 520 Notes

521 The authors declare no competing financial interest.

## 522 Acknowledgment

523 This work was funded by the Lundbeck foundation (grant R250-2017-1293 and R346-2020-1759)  
524 for M.Z. Villum foundation young investigator fellowship (grant 10099), and the Carlsberg  
525 foundation Distinguished Associate professor program (CF16-0797) and the NovoNordisk Center  
526 for Biopharmaceuticals and Biobarriers in Drug Delivery (NNF16OC0021948) for N.S.H. Villum  
527 foundation young investigator fellowship (grant 19175), the Novo Nordisk foundation  
528 (NNF16OC0021948) and Lundbeck foundation (R155-2013-14113) for V.F. China Scholarship  
529 Council (201709110108) for X.Z. Work at The Novo Nordisk Foundation Center for Protein  
530 Research (CPR) that NSH is associated with, is funded by a generous donation from the Novo  
531 Nordisk Foundation (Grant number NNF14CC0001). We thank Dr Y. Hu from Technical  
532 University of Denmark for the help with SEM imaging.

533 N.S.H. and V.F are members of the Integrative Structural Biology Cluster (ISBUC) at the  
534 University of Copenhagen.

## 535 REFERENCES

- 536 Andersen, C. B., Yagi, H., Manno, M., Martorana, V., Ban, T., Christiansen, G., . . . Rischel, C.  
537 (2009). Branching in Amyloid Fibril Growth. *Biophysical Journal*, 96(4), 1529-1536.  
538 doi:<http://doi.org/10.1016/j.bpj.2008.11.024>
- 539 Ban, T., Morigaki, K., Yagi, H., Kawasaki, T., Kobayashi, A., Yuba, S., . . . Goto, Y. (2006).  
540 Real-time and Single Fibril Observation of the Formation of Amyloid  $\beta$  Spherulitic  
541 Structures. *Journal of Biological Chemistry*, 281(44), 33677-33683.  
542 doi:10.1074/jbc.M606072200
- 543 Beheiry, M. E., & Dahan, M. (2013). ViSP: representing single-particle localizations in three  
544 dimensions. *Nature Methods*, 10, 689.  
545 doi:10.1038/nmeth.2566[https://www.nature.com/articles/nmeth.2566#supplementary-](https://www.nature.com/articles/nmeth.2566#supplementary-information)  
546 [information](https://www.nature.com/articles/nmeth.2566#supplementary-information)
- 547 Betzig, E., Patterson, G. H., Sougrat, R., Lindwasser, O. W., Olenych, S., Bonifacino, J. S., . . .  
548 Hess, H. F. (2006). Imaging Intracellular Fluorescent Proteins at Nanometer Resolution.  
549 *Science*, 313(5793), 1642-1645. doi:10.1126/science.1127344
- 550 Bohr, S. S. R., Lund, P. M., Kallenbach, A. S., Pinholt, H., Thomsen, J., Iversen, L., . . .  
551 Hatzakis, N. S. (2019). Direct observation of *Thermomyces lanuginosus* lipase



- 552 diffusional states by Single Particle Tracking and their remodeling by mutations and  
553 inhibition. *Scientific Reports*, 9(1), 16169. doi:10.1038/s41598-019-52539-1
- 554 Buell, A. K., Dhulesia, A., White, D. A., Knowles, T. P. J., Dobson, C. M., & Welland, M. E.  
555 (2012). Detailed Analysis of the Energy Barriers for Amyloid Fibril Growth. *Angewandte*  
556 *Chemie International Edition*, 51(21), 5247-5251.  
557 doi:<https://doi.org/10.1002/anie.201108040>
- 558 Burnette, D. T., Sengupta, P., Dai, Y., Lippincott-Schwartz, J., & Kachar, B. (2011).  
559 Bleaching/blinking assisted localization microscopy for superresolution imaging using  
560 standard fluorescent molecules. *Proceedings of the National Academy of Sciences*,  
561 108(52), 21081-21086. doi:10.1073/pnas.1117430109
- 562 Chen, W., Young, L. J., Lu, M., Zaccane, A., Ströhl, F., Yu, N., . . . Kaminski, C. F. (2017).  
563 Fluorescence Self-Quenching from Reporter Dyes Informs on the Structural Properties of  
564 Amyloid Clusters Formed in Vitro and in Cells. *Nano Letters*, 17(1), 143-149.  
565 doi:10.1021/acs.nanolett.6b03686
- 566 Chiti, F., & Dobson, C. M. (2006). Protein Misfolding, Functional Amyloid, and Human  
567 Disease. *Annual Review of Biochemistry*, 75(1), 333-366.  
568 doi:10.1146/annurev.biochem.75.101304.123901
- 569 Cohen, S. I. A., Cukalevski, R., Michaels, T. C. T., Šarić, A., Törnquist, M., Vendruscolo, M., . .  
570 . Linse, S. (2018). Distinct thermodynamic signatures of oligomer generation in the  
571 aggregation of the amyloid- $\beta$  peptide. *Nature Chemistry*, 10(5), 523-531.  
572 doi:10.1038/s41557-018-0023-x
- 573 Cowan, N. B., & Ivezić, Ž. (2008). The Environment of Galaxies at Low Redshift. *The*  
574 *Astrophysical Journal*, 674(1), L13-L16. doi:10.1086/528986
- 575 Domike, K. R., & Donald, A. M. (2007). Thermal Dependence of Thermally Induced Protein  
576 Spherulite Formation and Growth: Kinetics of  $\beta$ -lactoglobulin and Insulin.  
577 *Biomacromolecules*, 8(12), 3930-3937. doi:10.1021/bm7009224
- 578 Domike, K. R., & Donald, A. M. (2009). Kinetics of spherulite formation and growth: Salt and  
579 protein concentration dependence on proteins  $\beta$ -lactoglobulin and insulin. *International*  
580 *Journal of Biological Macromolecules*, 44(4), 301-310.  
581 doi:<https://doi.org/10.1016/j.jbiomac.2008.12.014>
- 582 Elsharkawy, S., Al-Jawad, M., Pantano, M. F., Tejada-Montes, E., Mehta, K., Jamal, H., . . .  
583 Mata, A. (2018). Protein disorder-order interplay to guide the growth of hierarchical  
584 mineralized structures. *Nature Communications*, 9. doi:ARTN 214510.1038/s41467-018-  
585 04319-0
- 586 Exley, C., House, E., Collingwood, J. F., Davidson, M. R., Cannon, D., & Donald, A. M. (2010).  
587 Spherulites of Amyloid-beta(42) In Vitro and in Alzheimer's Disease. *Journal of*  
588 *Alzheimers Disease*, 20(4), 1159-1165. doi:10.3233/jad-2010-091630
- 589 Foderà, V., Cataldo, S., Librizzi, F., Pignataro, B., Spiccia, P., & Leone, M. (2009). Self-  
590 Organization Pathways and Spatial Heterogeneity in Insulin Amyloid Fibril Formation.  
591 *The Journal of Physical Chemistry B*, 113(31), 10830-10837. doi:10.1021/jp810972y
- 592 Foderà, V., & Donald, A. M. (2010). Tracking the heterogeneous distribution of amyloid  
593 spherulites and their population balance with free fibrils. *The European Physical Journal*  
594 *E*, 33(4), 273-282. doi:10.1140/epje/i2010-10665-4
- 595 Foderà, V., van de Weert, M., & Vestergaard, B. (2010). Large-scale polymorphism and auto-  
596 catalytic effect in insulin fibrillogenesis. *Soft Matter*, 6(18), 4413-4419.  
597 doi:10.1039/C0SM00169D

- 598 Foderà, V., Vetri, V., Wind, T. S., Noppe, W., Cornett, C., Donald, A. M., . . . Vestergaard, B.  
599 (2014). Observation of the Early Structural Changes Leading to the Formation of Protein  
600 Superstructures. *The Journal of Physical Chemistry Letters*, 5(18), 3254-3258.  
601 doi:10.1021/jz501614e
- 602 Foderà, V., Zaccone, A., Lattuada, M., & Donald, A. M. (2013). Electrostatics Controls the  
603 Formation of Amyloid Superstructures in Protein Aggregation. *Physical Review Letters*,  
604 111(10), 108105. doi:10.1103/PhysRevLett.111.108105
- 605 Galkin, O., & Vekilov, P. G. (2004). Mechanisms of Homogeneous Nucleation of Polymers of  
606 Sick Cell Anemia Hemoglobin in Deoxy State. *Journal of Molecular Biology*, 336(1),  
607 43-59. doi:<https://doi.org/10.1016/j.jmb.2003.12.019>
- 608 Garcia, G. A., Cohen, S. I. A., Dobson, C. M., & Knowles, T. P. J. (2014). Nucleation-  
609 conversion-polymerization reactions of biological macromolecules with prenucleation  
610 clusters. *Physical Review E*, 89(3), 032712. doi:10.1103/PhysRevE.89.032712
- 611 Goldenfeld, N. (1987). Theory of spherulitic crystallization. *Journal of Crystal Growth*, 84(4),  
612 601-608. doi:[https://doi.org/10.1016/0022-0248\(87\)90051-0](https://doi.org/10.1016/0022-0248(87)90051-0)
- 613 Gordon, M. P., Ha, T., & Selvin, P. R. (2004). Single-molecule high-resolution imaging with  
614 photobleaching. *Proceedings of the National Academy of Sciences of the United States of*  
615 *America*, 101(17), 6462-6465. doi:10.1073/pnas.0401638101
- 616 Gránásy, L., Pusztai, T., Tegze, G., Warren, J. A., & Douglas, J. F. (2005). Growth and form of  
617 spherulites. *Physical Review E*, 72(1), 011605. doi:10.1103/PhysRevE.72.011605
- 618 Hayashi, S., & Okada, Y. (2015). Ultrafast superresolution fluorescence imaging with spinning  
619 disk confocal microscope optics. *Molecular Biology of the Cell*, 26(9), 1743-1751.  
620 doi:10.1091/mbc.E14-08-1287
- 621 Heaney, P. J., & Davis, A. M. (1995). Observation and Origin of Self-Organized Textures in  
622 Agates. *Science*, 269(5230), 1562-1565. doi:10.1126/science.269.5230.1562
- 623 Hosier, I. L., Bassett, D. C., & Vaughan, A. S. (2000). Spherulitic Growth and Cellulation in  
624 Dilute Blends of Monodisperse Long n-Alkanes. *Macromolecules*, 33(23), 8781-8790.  
625 doi:10.1021/ma000946t
- 626 House, E., Jones, K., & Exley, C. (2011). Spherulites in Human Brain Tissue are Composed of  
627 Beta Sheets of Amyloid and Resemble Senile Plaques. *Journal of Alzheimers Disease*,  
628 25(1), 43-46. doi:10.3233/jad-2011-110071
- 629 Huang, B., Jones, S. A., Brandenburg, B., & Zhuang, X. (2008). Whole-cell 3D STORM reveals  
630 interactions between cellular structures with nanometer-scale resolution. *Nature Methods*,  
631 5, 1047. doi:10.1038/nmeth.1274
- 632 Huang, B., Wang, W., Bates, M., & Zhuang, X. (2008). Three-Dimensional Super-Resolution  
633 Imaging by Stochastic Optical Reconstruction Microscopy. *Science*, 319(5864), 810-813.  
634 doi:10.1126/science.1153529
- 635 Jensen, S. B., Thodberg, S., Parween, S., Moses, M. E., Hansen, C. C., Thomsen, J., . . .  
636 Hatzakis, N. S. (2021). Biased cytochrome P450-mediated metabolism via small-  
637 molecule ligands binding P450 oxidoreductase. *Nature Communications*, 12(1), 2260.  
638 doi:10.1038/s41467-021-22562-w
- 639 Jiang, Y., Shi, K., Xia, D., Wang, S., Song, T., & Cui, F. Protein Spherulites for Sustained  
640 Release of Interferon: Preparation, Characterization and *in vivo* Evaluation.  
641 *Journal of Pharmaceutical Sciences*, 100(5), 1913-1922. doi:10.1002/jps.22403

- 642 Kajioka, H., Hikosaka, M., Taguchi, K., & Toda, A. (2008). Branching and re-orientation of  
643 lamellar crystals in non-banded poly(butene-1) spherulites. *Polymer*, *49*(6), 1685-1692.  
644 doi:<https://doi.org/10.1016/j.polymer.2008.01.066>
- 645 Krebs, M. R. H., Bromley, E. H. C., Rogers, S. S., & Donald, A. M. (2005). The mechanism of  
646 amyloid spherulite formation by bovine insulin. *Biophysical Journal*, *88*(3), 2013-2021.  
647 doi:10.1529/biophysj.104.051896
- 648 Krebs, M. R. H., MacPhee, C. E., Miller, A. F., Dunlop, I. E., Dobson, C. M., & Donald, A. M.  
649 (2004). The formation of spherulites by amyloid fibrils of bovine insulin. *Proceedings of*  
650 *the National Academy of Sciences of the United States of America*, *101*(40), 14420-  
651 14424. doi:10.1073/pnas.0405933101
- 652 Lu, Z. P., Goh, T. T., Li, Y., & Ng, S. C. (1999). Glass formation in La-based La-Al-Ni-Cu-  
653 (Co) alloys by Bridgman solidification and their glass forming ability. *Acta Materialia*,  
654 *47*(7), 2215-2224. doi:[https://doi.org/10.1016/S1359-6454\(99\)00058-0](https://doi.org/10.1016/S1359-6454(99)00058-0)
- 655 Majumder, S., Busch, H., Poudel, P., Mecking, S., & Reiter, G. (2018). Growth Kinetics of  
656 Stacks of Lamellar Polymer Crystals. *Macromolecules*, *51*(21), 8738-8745.  
657 doi:10.1021/acs.macromol.8b01765
- 658 Malle, M. G., Löffler, P. M. G., Bohr, S. S.-R., Sletfjerding, M. B., Risgaard, N. A., Jensen, S.  
659 B., . . . Hatzakis, N. S. (2021). Single particle combinatorial multiplexed liposome fusion  
660 mediated by DNA. *bioRxiv*, 2021.2001.2019.427313. doi:10.1101/2021.01.19.427313
- 661 Moses, M. E., Lund, P. M., Bohr, S. S. R., Iversen, J. F., Kæstel-Hansen, J., Kallenbach, A. S., . .  
662 . Hatzakis, N. S. (2021). Single-Molecule Study of Thermomyces lanuginosus Lipase in a  
663 Detergency Application System Reveals Diffusion Pattern Remodeling by Surfactants  
664 and Calcium. *ACS Applied Materials and Interfaces*, *13*(28), 33704-33712.  
665 doi:10.1021/acsami.1c08809
- 666 Nielsen, L., Khurana, R., Coats, A., Frokjaer, S., Brange, J., Vyas, S., . . . Fink, A. L. (2001).  
667 Effect of Environmental Factors on the Kinetics of Insulin Fibril Formation: Elucidation  
668 of the Molecular Mechanism. *Biochemistry*, *40*(20), 6036-6046. doi:10.1021/bi002555c
- 669 Ogi, H., Fukukushima, M., Hamada, H., Noi, K., Hirao, M., Yagi, H., & Goto, Y. (2014).  
670 Ultrafast propagation of  $\beta$ -amyloid fibrils in oligomeric cloud. *Scientific Reports*, *4*(1),  
671 6960. doi:10.1038/srep06960
- 672 Ovesný, M., Křížek, P., Borkovec, J., Švindrych, Z., & Hagen, G. M. (2014). ThunderSTORM: a  
673 comprehensive ImageJ plug-in for PALM and STORM data analysis and super-resolution  
674 imaging. *Bioinformatics*, *30*(16), 2389-2390. doi:10.1093/bioinformatics/btu202
- 675 Pinholt, H. D., Bohr, S. S.-R., Iversen, J. F., Boomsma, W., & Hatzakis, N. S. (2021). Single-  
676 particle diffusional fingerprinting: A machine-learning framework for quantitative  
677 analysis of heterogeneous diffusion. *Proceedings of the National Academy of Sciences*,  
678 *118*(31), e2104624118. doi:10.1073/pnas.2104624118
- 679 Pinotsi, D., Buell, A. K., Dobson, C. M., Schierle, G. S. K., & Kaminski, C. F. (2013). A  
680 Label - Free, Quantitative Assay of Amyloid Fibril Growth Based on Intrinsic  
681 Fluorescence. *ChemBioChem*, *14*(7), 846-850. doi:doi:10.1002/cbic.201300103
- 682 Pinotsi, D., Buell, A. K., Galvagnion, C., Dobson, C. M., Kaminski Schierle, G. S., & Kaminski,  
683 C. F. (2014). Direct Observation of Heterogeneous Amyloid Fibril Growth Kinetics via  
684 Two-Color Super-Resolution Microscopy. *Nano Letters*, *14*(1), 339-345.  
685 doi:10.1021/nl4041093

- 686 Qu, X., Wu, D., Mets, L., & Scherer, N. F. (2004). Nanometer-localized multiple single-  
687 molecule fluorescence microscopy. *Proceedings of the National Academy of Sciences of*  
688 *the United States of America*, *101*(31), 11298-11303. doi:10.1073/pnas.0402155101
- 689 Ries, J., Udayar, V., Soragni, A., Hornemann, S., Nilsson, K. P. R., Riek, R., . . . Rajendran, L.  
690 (2013). Superresolution Imaging of Amyloid Fibrils with Binding-Activated Probes. *ACS*  
691 *Chemical Neuroscience*, *4*(7), 1057-1061. doi:10.1021/cn400091m
- 692 Rogers, S. S., Krebs, M. R. H., Bromley, E. H. C., van der Linden, E., & Donald, A. M. (2006).  
693 Optical Microscopy of Growing Insulin Amyloid Spherulites on Surfaces In Vitro.  
694 *Biophysical Journal*, *90*(3), 1043-1054. doi:10.1529/biophysj.105.072660
- 695 Sang, J. C., Hidari, E., Meisl, G., Ranasinghe, R. T., Spillantini, M. G., & Klenerman, D. (2021).  
696 Super-resolution imaging reveals  $\alpha$ -synuclein seeded aggregation in SH-SY5Y cells.  
697 *Communications Biology*, *4*(1), 613. doi:10.1038/s42003-021-02126-w
- 698 Shen, Y., Ruggeri, F. S., Vigolo, D., Kamada, A., Qamar, S., Levin, A., . . . Knowles, T. P. J.  
699 (2020). Biomolecular condensates undergo a generic shear-mediated liquid-to-solid  
700 transition. *Nature Nanotechnology*, *15*(10), 841-847. doi:10.1038/s41565-020-0731-4
- 701 Shtukenberg, A. G., Punin, Y. O., Gunn, E., & Kahr, B. (2012). Spherulites. *Chemical Reviews*,  
702 *112*(3), 1805-1838. doi:10.1021/cr200297f
- 703 Song, S., Zhou, H., Ye, S., Tam, J., Howe, J. Y., Manners, I., & Winnik, M. A. Spherulite-like  
704 Micelles. *Angewandte Chemie International Edition*, *n/a*(n/a).  
705 doi:<https://doi.org/10.1002/anie.202101177>
- 706 Stella, S., Mesa, P., Thomsen, J., Paul, B., Alc3n, P., Jensen, S. B., . . . Montoya, G. (2018).  
707 Conformational Activation Promotes CRISPR-Cas12a Catalysis and Resetting of the  
708 Endonuclease Activity. *Cell*, *175*(7), 1856-1871.e1821.  
709 doi:<https://doi.org/10.1016/j.cell.2018.10.045>
- 710 Tanaka, H., & Nishi, T. (1985). New Types of Phase Separation Behavior during the  
711 Crystallization Process in Polymer Blends with Phase Diagram. *Physical Review Letters*,  
712 *55*(10), 1102-1105. doi:10.1103/PhysRevLett.55.1102
- 713 Thomsen, J., Sletfjerd, M., Jensen, S., Stella, S., Paul, B., Malle, M., . . . Hatzakis, N. (2020).  
714 DeepFRET, a software for rapid and automated single-molecule FRET data classification  
715 using deep learning. *eLife*, *9*. doi:10.7554/eLife.60404
- 716 Thomsen, R. P., Malle, M. G., Okholm, A. H., Krishnan, S., Bohr, S. S. R., S3rensen, R. S., . . .  
717 Kjems, J. (2019). A large size-selective DNA nanopore with sensing applications. *Nature*  
718 *Communications*, *10*(1), 5655. doi:10.1038/s41467-019-13284-1
- 719 Toprakcioglu, Z., Challa, P., Xu, C., & Knowles, T. P. J. (2019). Label-Free Analysis of Protein  
720 Aggregation and Phase Behavior. *ACS Nano*, *13*(12), 13940-13948.  
721 doi:10.1021/acsnano.9b05552
- 722 Vetri, V., & Foder3, V. (2015). The route to protein aggregate superstructures: Particulates and  
723 amyloid-like spherulites. *FEBS Letters*, *589*(19, Part A), 2448-2463.  
724 doi:<http://doi.org/10.1016/j.febslet.2015.07.006>
- 725 Yagi, H., Ban, T., Morigaki, K., Naiki, H., & Goto, Y. (2007). Visualization and Classification  
726 of Amyloid  $\beta$  Supramolecular Assemblies. *Biochemistry*, *46*(51), 15009-15017.  
727 doi:10.1021/bi701842n
- 728 Zimmermann, M. R., Bera, S. C., Meisl, G., Dasadhikari, S., Ghosh, S., Linse, S., . . . Knowles,  
729 T. P. J. (2021). Mechanism of Secondary Nucleation at the Single Fibril Level from  
730 Direct Observations of A $\beta$ 42 Aggregation. *Journal of the American Chemical Society*,  
731 *143*(40), 16621-16629. doi:10.1021/jacs.1c07228
